# Supplementary material for: Construction of Microporous Zincophilic Interface for Stable Zn Anode
Source: MDPI journal article supplement (doi:10.3390/molecules28124789), 2023-06-15
Supplement: s1 [file s1]

# Supplementary Information

## Construction of microporous zincophilic interface for stable Zn anode

Xin Yang <sup>1</sup>, Tie Shu <sup>1</sup>, Haoyu Huang <sup>2</sup>, Hongquan Yi <sup>2</sup>, Yanchi Zhang <sup>2</sup>, Wei Xiao <sup>2</sup>, Liang Li <sup>3</sup>, Yuxin Zhang <sup>4</sup>, Minghao Ma <sup>5</sup>, Xingyuan Liu <sup>6</sup> and Kexin Yao <sup>7,\*</sup>

<sup>1</sup> School of Chemistry and Chemical Engineering, Chongqing University, Chongqing 400044, China; xyang0610@163.com (X.Y.); shutie950112@163.com (T.S.)

<sup>2</sup> Undergraduate School, Chongqing University, Chongqing 400044, China; 17815041238@163.com (H.H.); 19132050489@163.com (H.Y.); 15772046781@163.com (Y.Z.); 13368183178@163.com (W.X.)

<sup>3</sup> Department of Sciences and Engineering, Sorbonne University Abu Dhabi, Abu Dhabi P.O. Box 38044, United Arab Emirates; liang.li@sorbonne.ae

<sup>4</sup> College of Material Science and Engineering, Chongqing University, Chongqing 400044, China; zhangyuxin@cqu.edu.cn

<sup>5</sup> Hang Tian School Affiliated to HSTJUT, Xi'an 710043, China; minghaomacqu@163.com

<sup>6</sup> Chongqing Joint School of Famous Schools, Chongqing 400030, China; wenqin@cqu.edu.cn

<sup>7</sup> State Key Laboratory of Coal Mine Disaster Dynamics and Control, Multi-Scale Porous Materials Center, Institute of Advanced Interdisciplinary Studies, School of Chemistry and Chemical Engineering, Chongqing University, Chongqing 400044, China

\* Correspondence: kexinyao@cqu.edu.cn

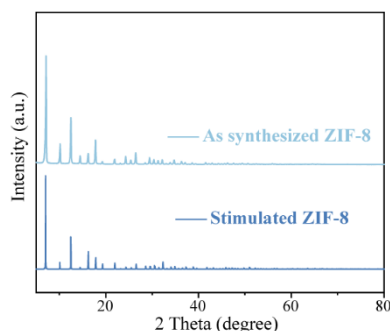

**Figure S1.** The XRD pattern of ZIF-8

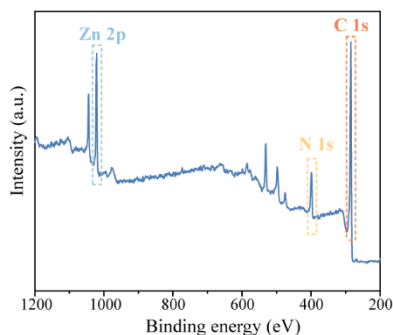

**Figure S2.** The wide-scan XPS spectrum of ZOCC

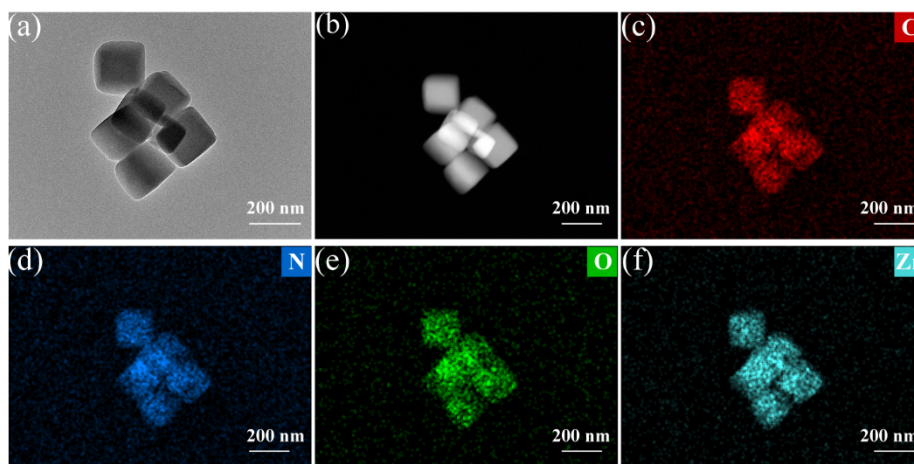

**Figure S3.** (a) TEM image of ZIF-8; (b) HAADF-STEM image of ZIF-8; Corresponding elemental mapping of (c) C; (d) N; (e) O; (f) Zn

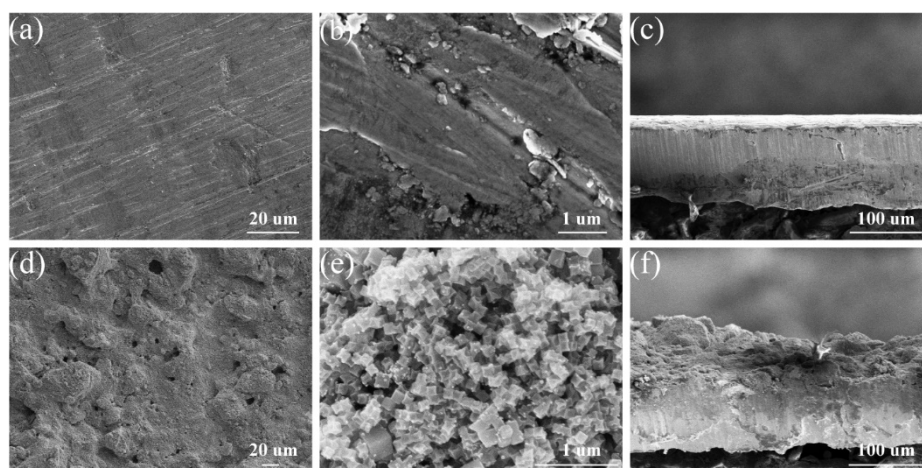

**Figure S4.** The surface morphology of bare Zn (a-b) and ZOCC@Zn (d-e) at different magnifications; The cross-sectional SEM images of bare Zn (c) and ZOCC@Zn (f)

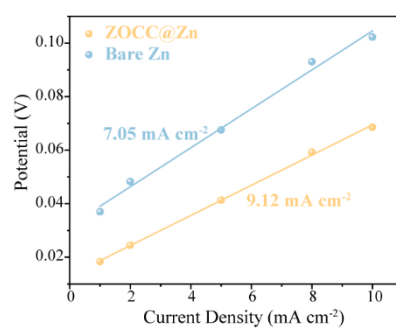

**Figure S5.** Exchange current density plot

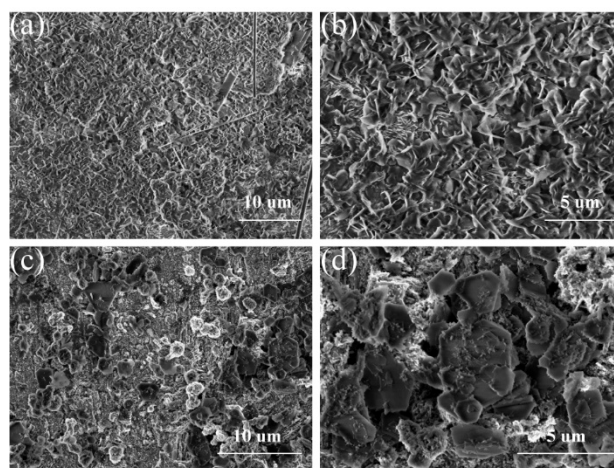

**Figure S6.** Surface morphology of bare Zn (a-b) and ZOCC@Zn (c-d) electrodes after 15 cycles at a current density of  $0.5 \text{ mA cm}^{-2}$  and a capacity of  $0.25 \text{ mA h cm}^{-2}$ , respectively

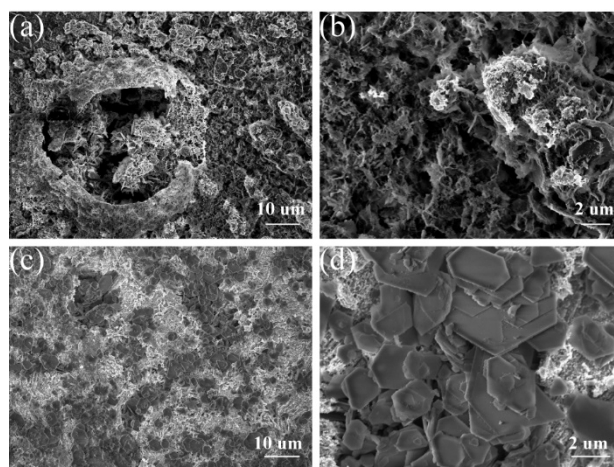

**Figure S7.** Surface morphology of bare Zn (a-b) and ZOCC@Zn (c-d) electrodes after 15 cycles at a current density of  $1 \text{ mA cm}^{-2}$  and a capacity of  $1 \text{ mA h cm}^{-2}$ , respectively

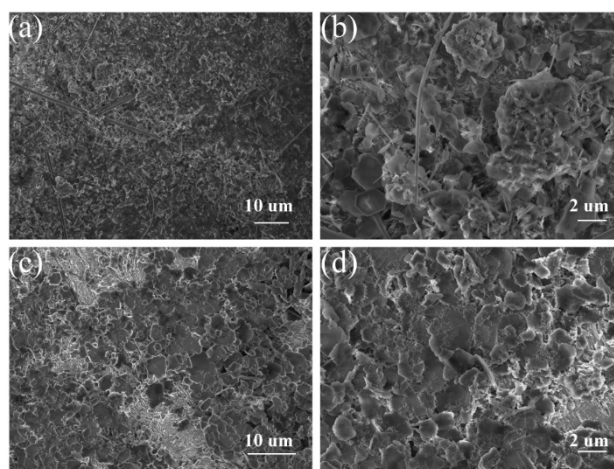

**Figure S8.** Surface morphology of bare Zn (a-b) and ZOCC@Zn (c-d) electrodes after 15 cycles at a

current density of  $5 \text{ mA cm}^{-2}$  and a capacity of  $1 \text{ mA h cm}^{-2}$ , respectively

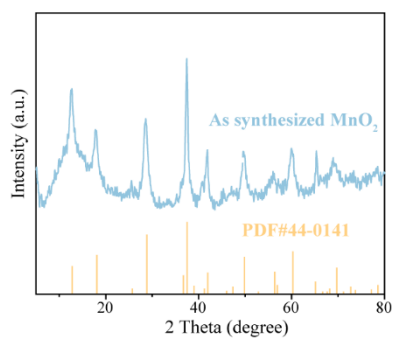

**Figure S9.** The XRD pattern of  $\alpha\text{-MnO}_2$

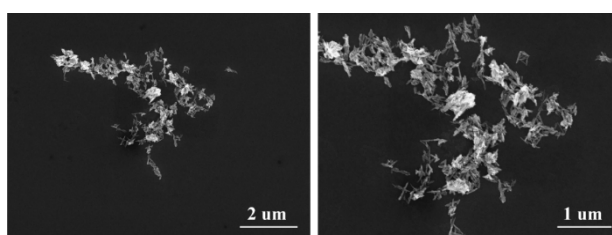

**Figure S10.** SEM pattern of  $\alpha\text{-MnO}_2$  at different magnifications

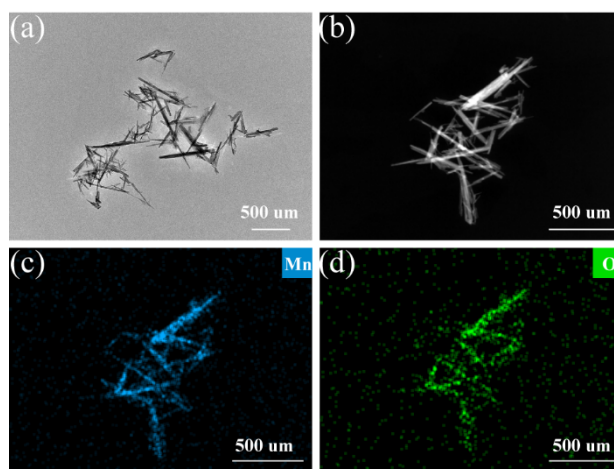

**Figure S11.** (a) TEM image of  $\alpha\text{-MnO}_2$ ; (b) HAADF-STEM image of  $\alpha\text{-MnO}_2$ ; Corresponding elemental mapping of (c) Mn and (d) O

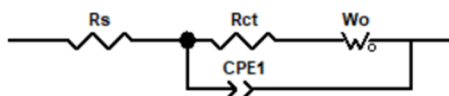

**Figure S12.** The equivalent circuit used for fitting the experimental EIS data
